# Supplementary material
Source: PubMed Central journal article supplement (PMC7039366)
Supplement: NIHMS1553171-supplement-Supplementary_material.pdf [file NIHMS1553171-supplement-Supplementary_material.pdf]

| Subject #                                                              |       |                    |                                                                                                                      |                                |                                   |          |
|------------------------------------------------------------------------|-------|--------------------|----------------------------------------------------------------------------------------------------------------------|--------------------------------|-----------------------------------|----------|
| <b>Composite Cerebrovascular Stenosis Score (CVSS)</b>                 |       |                    |                                                                                                                      |                                |                                   |          |
| Vessel                                                                 |       | Abnormal (yes/no)  | Degree of Stenosis<br>1= 1-50%, 2=50-99%                                                                             | Vessel occlusion<br>1= present | Unable to evaluate                | Comments |
| ICA                                                                    | Right |                    |                                                                                                                      |                                |                                   |          |
|                                                                        | Left  |                    |                                                                                                                      |                                |                                   |          |
| A1                                                                     | Right |                    |                                                                                                                      |                                |                                   |          |
|                                                                        | Left  |                    |                                                                                                                      |                                |                                   |          |
| ACA distal to A1                                                       | Right |                    |                                                                                                                      |                                |                                   |          |
|                                                                        | Left  |                    |                                                                                                                      |                                |                                   |          |
| ACOM                                                                   |       |                    |                                                                                                                      |                                |                                   |          |
| MCA*                                                                   | Right |                    |                                                                                                                      |                                |                                   |          |
|                                                                        | Left  |                    |                                                                                                                      |                                |                                   |          |
| PCA**                                                                  | Right |                    |                                                                                                                      |                                |                                   |          |
|                                                                        | Left  |                    |                                                                                                                      |                                |                                   |          |
| SCA                                                                    | Right |                    |                                                                                                                      |                                |                                   |          |
|                                                                        | Left  |                    |                                                                                                                      |                                |                                   |          |
| Basilar                                                                |       |                    |                                                                                                                      |                                |                                   |          |
| Vertebral                                                              | Right |                    | ***                                                                                                                  |                                |                                   |          |
|                                                                        | Left  |                    | ***                                                                                                                  |                                |                                   |          |
| PICA                                                                   | Right |                    |                                                                                                                      |                                |                                   |          |
|                                                                        | Left  |                    |                                                                                                                      |                                |                                   |          |
|                                                                        |       | Number of Vessels= | Total Stenosis score=                                                                                                | Total Occlusion score=         |                                   |          |
|                                                                        |       |                    | <b>Composite Cerebrovascular Stenosis Score (CVSS): Composite Stenosis Score + (Composite Occlusion Score x 3) =</b> |                                |                                   |          |
|                                                                        |       |                    |                                                                                                                      |                                | Arterial Distribution of Ischemia |          |
| *MCA up to the junction of M2/3                                        |       |                    |                                                                                                                      |                                | ICA                               | Right    |
| **PCA up to mid P3, anterior to the dorsal brainstem                   |       |                    |                                                                                                                      |                                |                                   | Left     |
| ***If vertebral appears hypoplastic do not score                       |       |                    |                                                                                                                      |                                | A1                                | Right    |
| Is ischemia restricted to the arterial distribution of stenosis (Y/N)? |       |                    |                                                                                                                      |                                |                                   | Left     |
|                                                                        |       |                    |                                                                                                                      |                                | ACA distal to A1                  | Right    |
|                                                                        |       |                    |                                                                                                                      |                                |                                   | Left     |
|                                                                        |       |                    |                                                                                                                      |                                | ACOM                              |          |
|                                                                        |       |                    |                                                                                                                      |                                | MCA                               | Right    |
|                                                                        |       |                    |                                                                                                                      |                                |                                   | Left     |
|                                                                        |       |                    |                                                                                                                      |                                | PCA                               | Right    |
|                                                                        |       |                    |                                                                                                                      |                                |                                   | Left     |
|                                                                        |       |                    |                                                                                                                      |                                | SCA                               | Right    |
|                                                                        |       |                    |                                                                                                                      |                                |                                   | Left     |
|                                                                        |       |                    |                                                                                                                      |                                | Basilar                           |          |
|                                                                        |       |                    |                                                                                                                      |                                | Vertebral                         | Right    |
|                                                                        |       |                    |                                                                                                                      |                                |                                   | Left     |
|                                                                        |       |                    |                                                                                                                      |                                | PICA                              | Right    |
|                                                                        |       |                    |                                                                                                                      |                                |                                   | Left     |

**Appendix- scoring sheet**
